# Supplementary material
Source: Research Square preprint supplement (doi:10.21203/rs.3.rs-10340507/v1)
Supplement: Supplementary file 1 [file 730c9d5c0641f09dba0acd05.docx]

Construction of morphologically differentiated phosphorus-doped zinc oxide nanostructures and their supercapacitive properties

Xiaohui Huang *, Wenhao Zhou, Jian Wang, Hehui Wang

School of Environment and Chemical Engineering, Heilongjiang University of Science and Technology, China

* Corresponding authors.

E-mail address: 1614401842@qq.com (X. Huang)


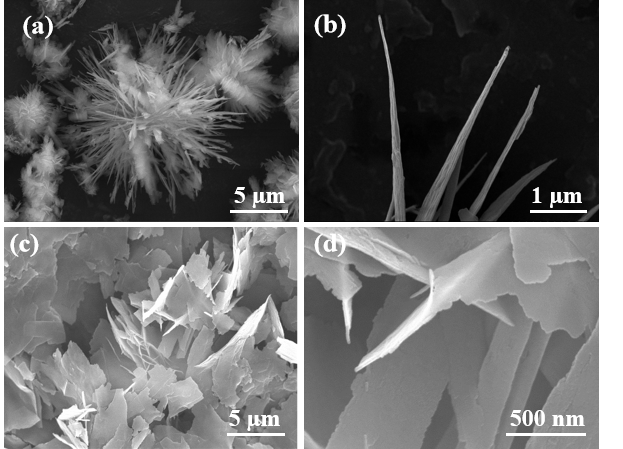


Figure S1. SEM images of ZNP: (a-b) ZNR-C120 and its high-magnification image; (c-d) ZNS-C110 and it shigh-magnification image


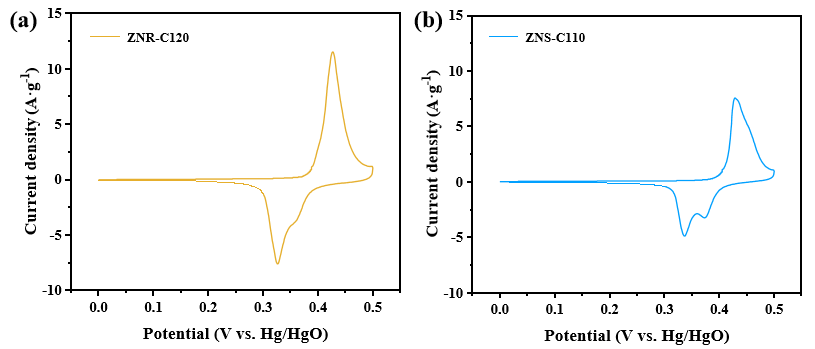


Figure S2. (a-b) CV curves of ZNR-C120 and ZNS-C110


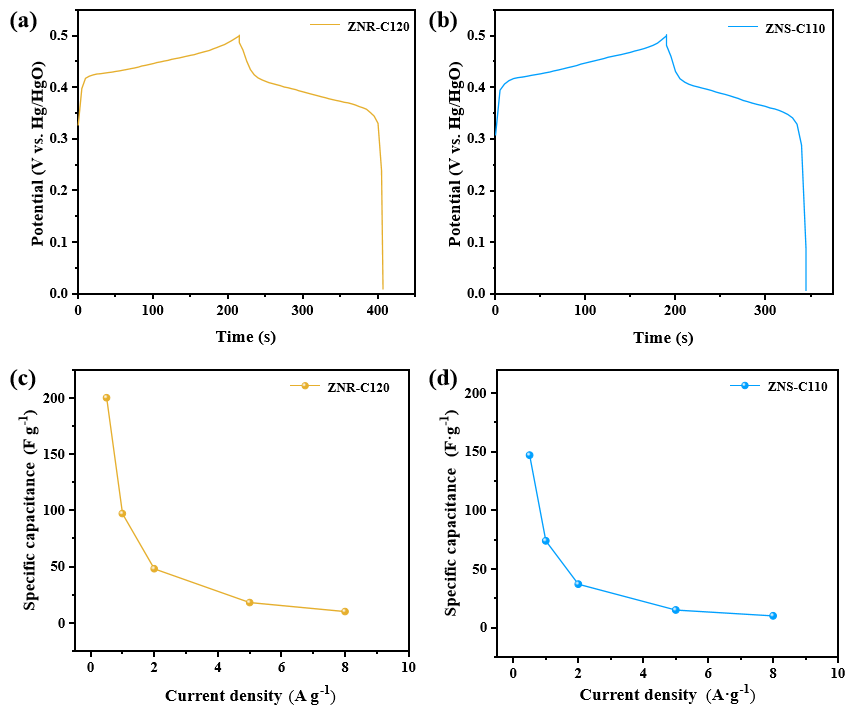


Figure S3. (a-b) GCD curves of ZNR-C120 and ZNS-C110; (c-d) rate performance curves of ZNR-C120 and ZNS-C110


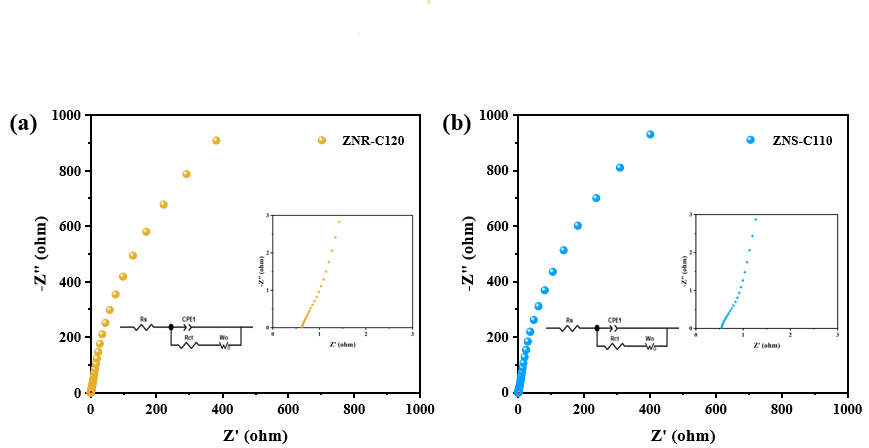


Figure S4. (a-b) Nyquist plots of ZNR-C120 and ZNS-C110
